# Supplementary material for: Temperature-boosted photocatalytic H2 production and charge transfer kinetics on TiO2 under UV and visible light
Source: Royal Society of Chemistry journal article supplement (doi:10.1039/c6pp00263c), 2016-08-12
Supplement: c6pp00263c1.pdf [file c6pp00263c1.pdf]

### Supporting Information

#### Temperature-boosted photocatalytic H<sub>2</sub> production and charge transfer kinetics on TiO<sub>2</sub> under UV and visible light

Gonu Kim,<sup>1</sup> Hee Joon Choi,<sup>2</sup> Hyoung-il Kim,<sup>3</sup> Jaehong Kim,<sup>3</sup> Damián Monllor-Satoca,<sup>4</sup>  
Minju Kim,<sup>5</sup> Hyunwoong Park<sup>5,\*</sup>

<sup>1</sup>*Department of Chemistry and Biology, Korea Science Academy of KAIST, Busan 47162, Korea*

<sup>2</sup>*Taejon Christian International School, Daejeon 34035, Korea*

<sup>3</sup>*Department of Chemical and Environmental Engineering, Yale University, New Haven, Connecticut 06511, United States*

<sup>4</sup>*Department of Analytical and Applied Chemistry, Institut Químic de Sarrià (IQS) - School of Engineering, Universitat Ramon Llull, Barcelona 08017, Spain*

<sup>5</sup>*School of Energy Engineering, Kyungpook National University, Daegu 41566, Korea*

To whom correspondence should be addressed:

(H.P.) E-mail: hwp@knu.ac.kr.; Tel.: +82-53-950-8973

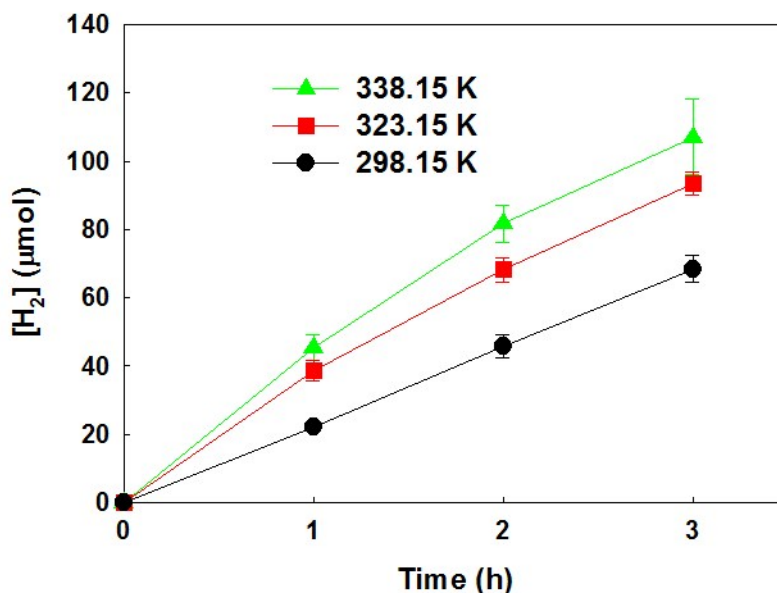

Figure S1. Time profile of temperature-dependent photocatalytic H<sub>2</sub> production under UV light ( $\lambda > 320$  nm) in the presence of [formic acid] = 10 mM.

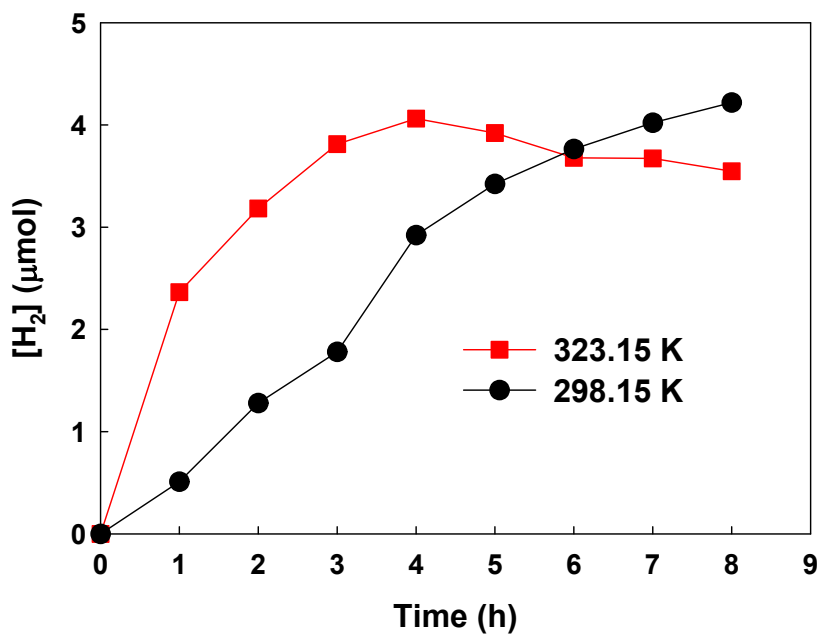

Figure S2. Photocatalytic H<sub>2</sub> production in aqueous Pt/TiO<sub>2</sub> suspensions under UV ( $\lambda > 320$  nm, pH 3).

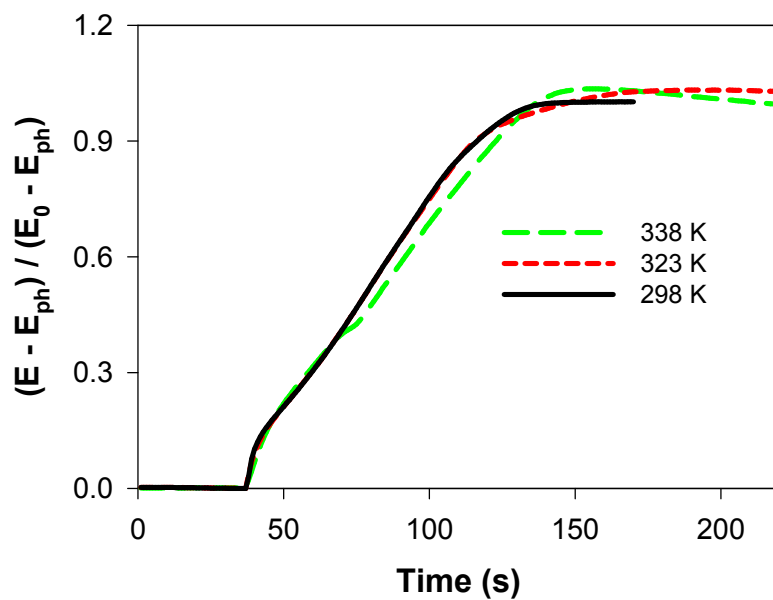

Figure S3. Time profiles of the open-circuit potential ( $E_{oc}$ ) decay

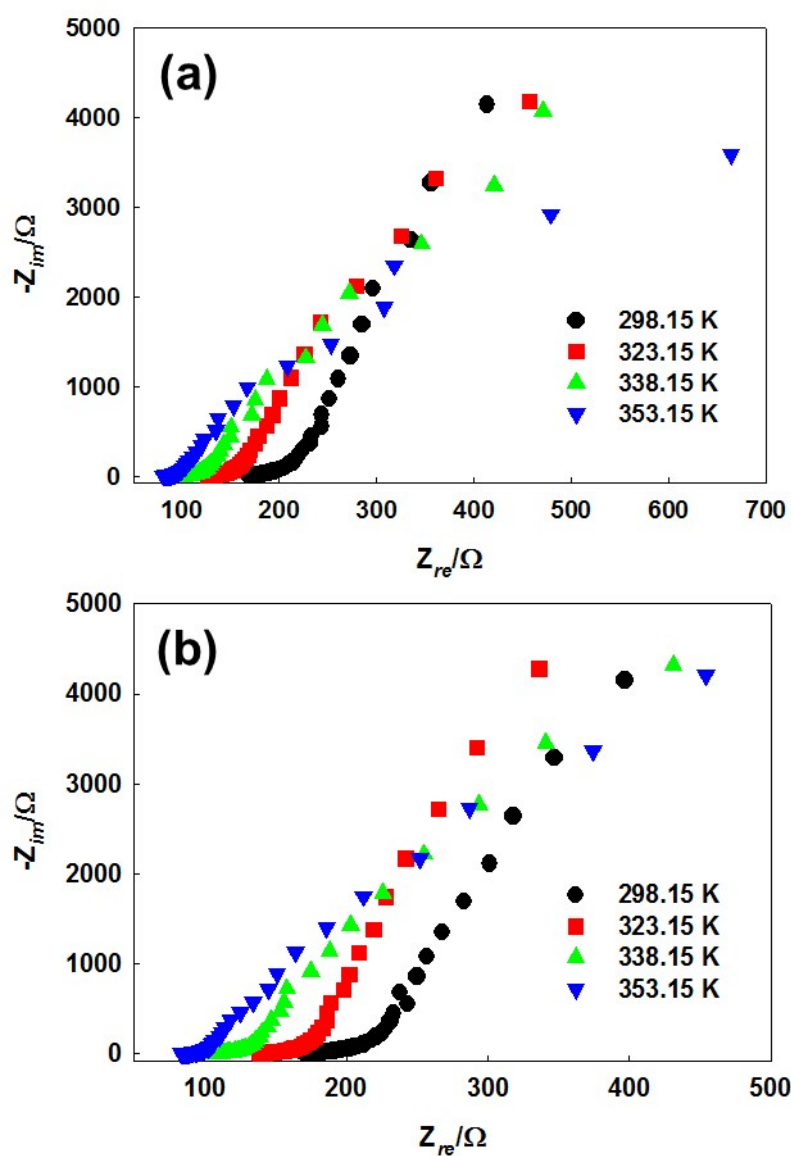

Figure S4. Electrochemical impedance spectroscopy (EIS) Nyquist plots obtained at the different temperature under (a) visible light irradiation ( $\lambda > 420$  nm) and (b) dark condition
